# Supplementary material
Source: Springer Nature journal article supplement (https://www.springermedizin.de/resource/supplementary/12955_2013_1334_MOESM4_ESM.pdf/9559598)

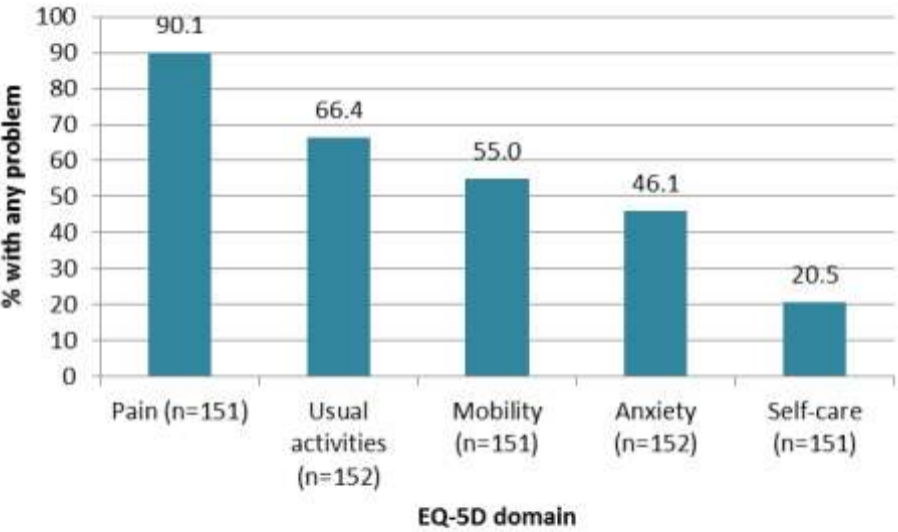

Supplement: MOESM4 [file 9559598]
